# Supplementary material
Source: publisher figshare collection journal article supplement (https://gsajournals.figshare.com/articles/dataset/_/9497666)

**A**

Flanking

Vasa\_Dros ERKREFYIPPEPSNDALIEIFSSGIAS-GIHFSKYNNIPVKVTG  
 DDX4\_Hs QGPKVTYIPPPPEDEDSIFAHYQT--GINFDKYDTILMEVSG  
 GLH-1\_Cele EGPKATYVPVEDNMEDVFNMQK-ISE-GLMFNKFDAEVKLTS  
 GLH-2\_Cele EGPKATYVPVEDNMEVFNMQK-ISE-GLMFNKFDAEVKITS  
 GLH-3\_Cele EPTKVTYVPVVDKMEVFSMLK-INA-GDFFDKFFDASVQLVS  
 VBH-1\_Cele ESNQWGGAPAEYSESNLFHRTDS---GINFDKYENIPMEVSG  
 LAF-1\_Cele GTSK WENRGARDERIEQELFSGQLS--GINFDKYEIPVEATG  
 RDE-12\_Cele SNSEGVNA PVRAPRDWVPVTRDIDELVRETADRLADCDVQDR  
 GLH-4\_Cele TRPKDLQGNFLESYDFVFTPDCKMFEDAVNNDKIDFDQKVA  
 DDX-19\_Cele VKPDSKYKFTKPATEEAHEQVPVPA-DIALLNKFIQKEVKMMK  
 DDX-17\_Cele -----LLYGKF-----

**B**

Vasa\_Dros ATNVEEEEQWD  
 DDX4\_Hs APNPVDESWD  
 GLH-1\_Cele TQVPQDEEGW  
 GLH-2\_Cele PTQKQDEDCW  
 GLH-3\_Cele IDTEEPPEAW  
 VBH-1\_Cele PIDHWQAPQA  
 LAF-1\_Cele ORAOPOODWWS  
 RDE-12\_Cele GADGNDDDEW  
 GLH-4\_Cele DDWNEQEQEW  
 DDX-19\_Cele LVELEAIEMA  
 DDX-17\_Cele GGGSGGGGRW

**C****Vasa N-terminal Zn-knuckle Domain Conservation**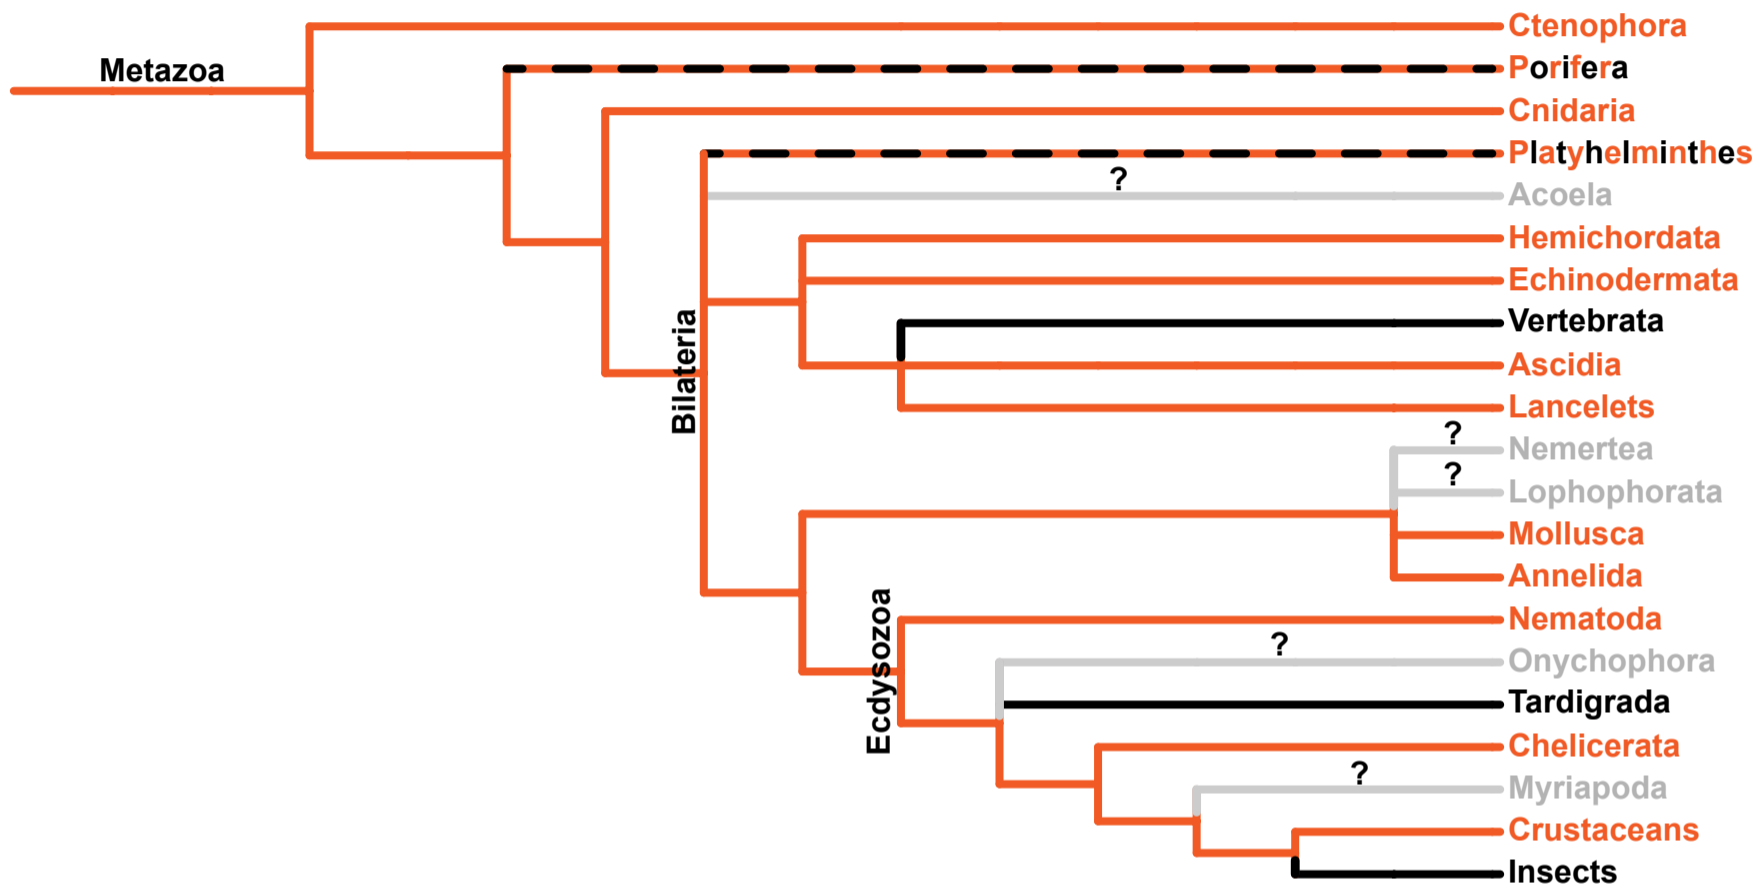

Supplement: Supplementary file [file 1]
